# Supplementary material
Source: PubMed Central journal article supplement (PMC3060759)
Supplement: NIHMS277621-supplement-Fig_1.pdf [file NIHMS277621-supplement-Fig_1.pdf]

## Supplementary Information Figure Captions

**Supplementary Figure 1.** Characterization of polyamide **2**. a) Analytical HPLC trace at 310 nm. b) MALDI-ToF MS data. Expected mass: 1358.6; Observed mass: 1358.4. Characterization data for polyamides **1** and **3** have been previously published (Nickols, N. G., Jacobs, C. S., Farkas, M. E., and Dervan, P. B. (2007) Improved nuclear localization of DNA-binding polyamides, *Nucleic Acids Res.* **35**, 363–370.)
