# Supplementary material
Source: PubMed Central journal article supplement (PMC3060759)
Supplement: NIHMS277621-supplement-Table_S1.pdf [file NIHMS277621-supplement-Table_S1.pdf]

**Table S1.** Binding affinities ( $M^{-1}$ ) for polyamides **1**, **2**, **3**, and Echinomycin (**E**) at HRE on pGL2-VEGF-*Luc* and pCSJ-FLT1.

| pGL2-VEGF- <i>Luc</i> | Ligand   | Sequence     | $K_a$ ( $M^{-1}$ )             |
|-----------------------|----------|--------------|--------------------------------|
|                       | <b>1</b> | 5'-ATACGT-3' | $2.6 (\pm 0.4) \times 10^{10}$ |
|                       | <b>2</b> | 5'-AGTGCA-3' | $3.2 (\pm 0.6) \times 10^9$    |
|                       | <b>3</b> | 5'-TGGGCT-3' | $8.0 (\pm 1.0) \times 10^8$    |
|                       | <b>E</b> | 5'-ATACGT-3' | $8.4 (\pm 2.1) \times 10^6$    |
| pCSJ-FLT1             | Ligand   | Sequence     | $K_a$ ( $M^{-1}$ )             |
|                       | <b>1</b> | 5'-CAACGT-3' | $2.7 (\pm 0.2) \times 10^9$    |
|                       | <b>2</b> | 5'-TGAGGA-3' | $2.2 (\pm 0.8) \times 10^8$    |
|                       | <b>3</b> | 5'-CAACGT-3' | -----                          |
|                       | <b>E</b> | 5'-CAACGT-3' | $2.9 (\pm 0.7) \times 10^7$    |

Equilibrium association constants reported are mean values from three DNase 1 footprint titration experiments; standard deviations are shown in parentheses.
