# Supplementary material
Source: PubMed Central journal article supplement (PMC3060759)

**a**

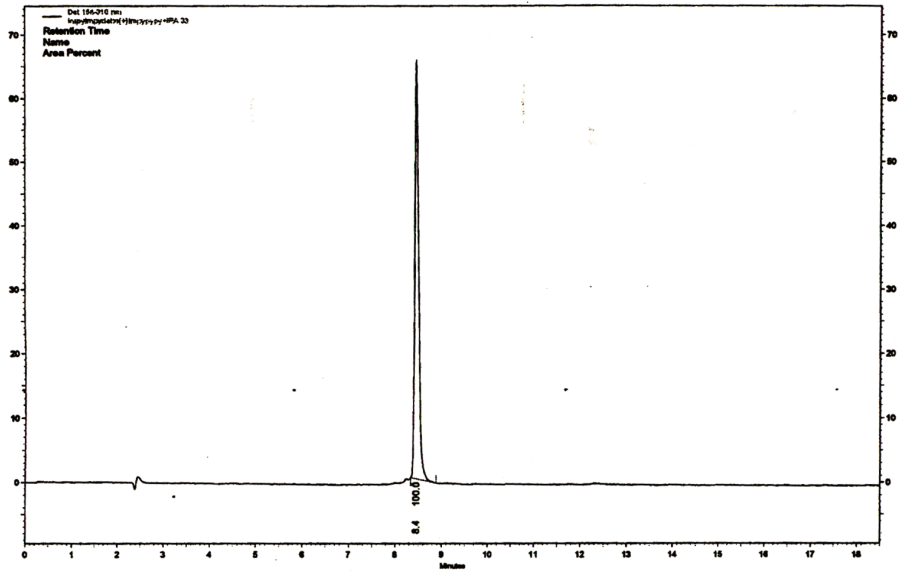

**b**

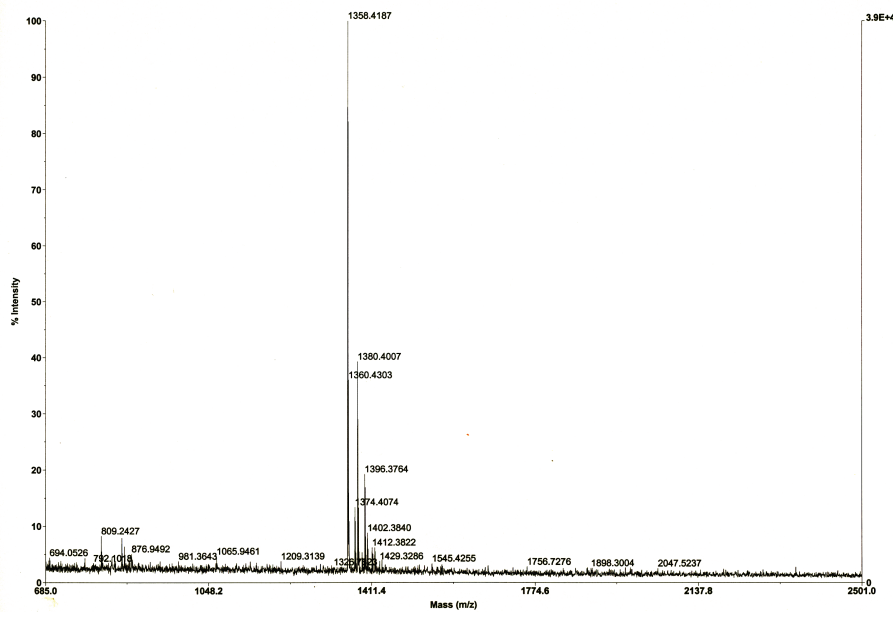

Supplement: NIHMS277621-supplement-a__b.pdf [file NIHMS277621-supplement-a__b.pdf]
